# Supplementary material for: A Closed System for Pico-Liter Order Substance Transport from a Giant Liposome to a Cell
Source: MDPI journal article supplement (doi:10.3390/mi9070331), 2018-07-02
Supplement: s1 [file s1]

## Supplementary Material: A Closed System for Pico-Liter Order Substance Transport from a Giant Liposome to a Cell

Shohei Miyakawa, Kaoru Uesugi and Keisuke Morishima

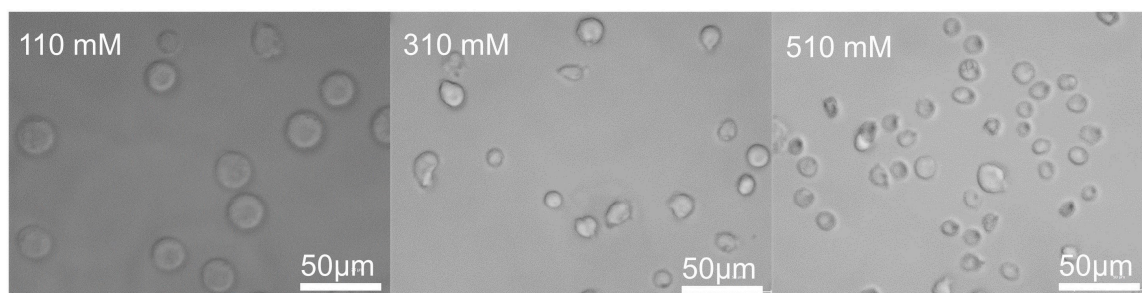

**Figure S1.** Bright field image of cells in the 110 mM, 310 mM, and 510 mM fusion buffer.
